# Supplementary material
Source: PubMed Central journal article supplement (PMC10257142)
Supplement: NIHMS1891685-supplement-SI_Fig__1.pdf [file NIHMS1891685-supplement-SI_Fig__1.pdf]

# Supplementary Figure 1

## Figure 2c

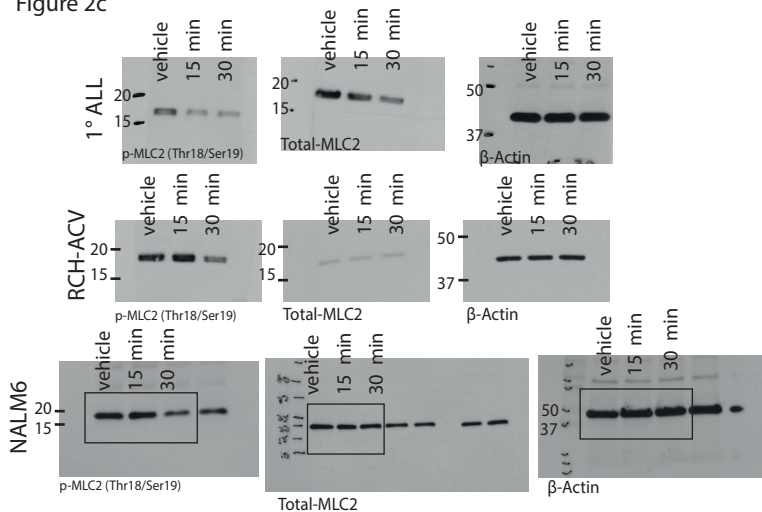

## Figure 2i

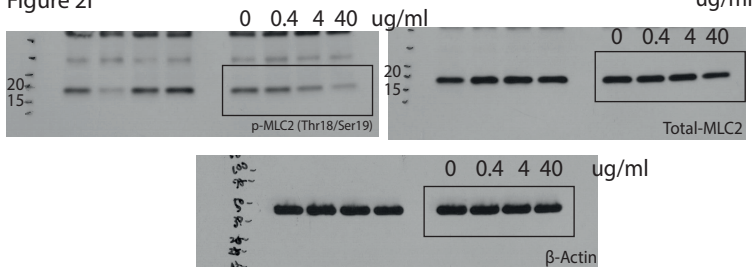

Original source images for all data obtained by electrophoretic separation (Western Blot)
