# Supplementary material
Source: PubMed Central journal article supplement (PMC10257142)

## Supplementary Figure 2

### Gating strategy through isotype control

### Gating strategy for Annexin V staining

Phase 1: gate around viable cells excluding debris and doublets

Phase 2: gate for positively stained cells by excluding cells treated with isotype control

Phase 1: gate around viable cells excluding debris and doublets

Phase 2: gate for Annexin V stained cells by excluding unstained cells

Isotype control treated sample

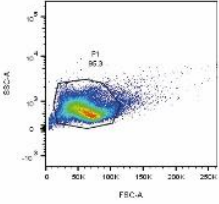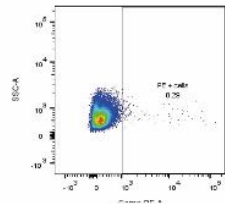

Unstained sample

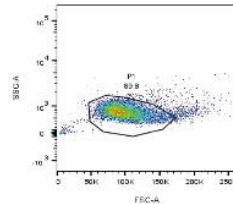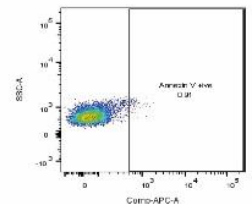

CD49f-PE treated sample

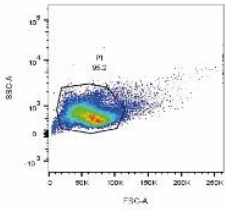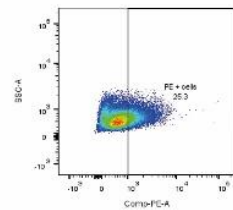

Annexin V stained sample

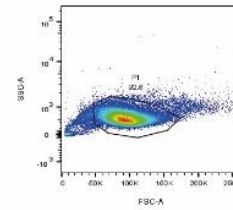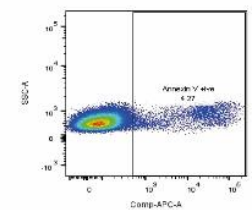

Supplement: NIHMS1891685-supplement-SI_Fig__2.pdf [file NIHMS1891685-supplement-SI_Fig__2.pdf]
